# Supplementary material for: Comparing quality of reporting between preprints and peer-reviewed articles in the biomedical literature
Source: bioRxiv or medRxiv preprint supplement (doi:10.1101/581892), 2020-10-08
Supplement: Supplementary file [file media-4.pdf]

**Table S1** – Questionnaire for evaluating quality of reporting. Items that were changed with respect to the originally registered protocol are marked with an asterisk. The first 5 sections are applicable to all categories of articles and compose the general score. The last 4 sections are applicable only to the corresponding category of study, classified according to the biological model, and compose category-specific scores.

---

**Title/Abstract**

---

1. Is the biological model / species of animal under study reported?  
(Yes – 1; No – 0)

---

**Risk of Bias**

---

1. Do the authors report their funding source(s)?  
(Yes – 1; No – 0)
2. Is there a statement describing the presence or absence of conflict of interest?  
(Yes, and the statement reports a conflict of interest – 1; Yes, and the statement reports no conflict of interest – 1; No statement is present – 0)
3. Is a sample size calculation reported?  
(Sample size calculation is reported, with parameters – 1; Sample size calculation is reported, without parameters – 0.5; Sample size calculation is NOT reported – 0)
4. Is assessment of outcome measures reported to be done in a blinded fashion?  
(Yes (blinded) – 1; No – 0; Automated/Not applicable)

---

**Drugs and Reagents**

---

1. Are the suppliers for all drugs or other treatments in the data under analysis reported?  
(Yes – 1; Partially – 0.5; No – 0; Not applicable)
2. Is every antibody used in the data under analysis linked to a citation, catalogue number, clone number or validation profile?  
(Yes – 1; No – 0; Not applicable)
3. For pharmacological interventions, is the dose/concentration reported?  
(Yes – 1; Partially – 0.5; No – 0; Not applicable)
4. For pharmacological interventions, is the vehicle reported?  
(Yes – 1; No – 0; Not applicable)

---

**Data Presentation**

---

1. Are the groups compared clearly described?  
(Yes – 1; No – 0)
2. Does the study provide a clear timeline for the experimental procedures or exposures and the measurement of outcomes in the data under analysis?  
(Yes – 1; No – 0; Not applicable)
3. Is a well-defined summary estimate (e.g. mean or median) of quantitative variables provided for each group? (If “Not applicable” is chosen, please provide the reason)  
(Yes – 1; No – 0; Not applicable)
4. Are findings presented with a well-defined measure of variation or precision (e.g. SD/SEM/X%CI)? (If “Not applicable” is chosen, please provide the reason)  
(Yes – 1; No – 0; Not applicable)
5. Are unit level data presented?  
(Yes (in figures) – 1; Yes (in raw data) – 1 ; Yes (both) – 1; No – 0; Not applicable)
6. Are all data shown in figures or tables clearly attributable to a specific experimental group/condition?  
(Yes – 1; No – 0; Not applicable)
7. Are the units for each quantitative measure/indexes shown in figures clearly described?

(Yes – 1; No – 0; Not applicable)

8. Is the meaning of any symbols used in figures/tables (e.g. \*, #, <sup>a</sup>) clearly described?

(Yes – 1; No – 0; Not applicable)

#### **Data Analysis**

---

1. Is the experimental unit used for analysis clear?

(Yes – 1; No – 0; Not applicable)

2. Is sample size reported for each group?

(Yes (exact) – 1; Yes (range) – 0.5\*; Partially – 0.5; No – 0)

3. Are the statistical tests used clearly described?

(Yes – 1; No – 0)

4. Are the variables and groups to which each statistical result refers to made clear?

(Yes – 1; No – 0)

5. Are the results of statistical tests in the figure (including omnibus and post-hoc comparisons) provided (as a p value or otherwise)?

(Yes – 1; Partially – 0.5; No – 0)

6. Are exact p values reported up to 2 decimal units (e.g. p=0.46, p=0.05, p<0.01)?

(Yes – 1; Partially – 0.5; No – 0)

#### ***In vitro* studies**

---

1. Was the source of cell lines or microorganisms provided?

(Yes – 1; Partially – 0.5; No – 0; Not applicable)

2. For studies involving cell lines or microorganisms, do the authors report whether they have been authenticated recently (e.g., by STR profiling, within 1 year of use)?

(Yes – 1; Yes, but timing is not mentioned (or is more than one year before experiments) – 0.5; Partially – 0.5; No – 0; Not applicable)

3. Is the culture medium reported?

(Yes – 1; Partially – 0.5; No – 0)

4. Are the culture conditions (temperature, [CO<sub>2</sub>] and presence of O<sub>2</sub>) reported?

(Yes – 1; Partially – 0.5; No – 0)

#### **Animal studies (invertebrates)**

---

1. Is the animal species reported? (if yes, please specify which species)

(Yes – 1; No – 0)

2. Is the strain of the animals reported?

(Yes – 1; No – 0; Not applicable)

3. Is the sex of the animals reported?

(Yes – 1; No – 0; Not applicable)

4. Is the age of the animals reported?

(Yes (exact) – 1; Yes (range) – 0.5; No – 0; Not applicable)

5. Is the source/supplier of the animals reported?

(Yes – 1; No – 0; Not applicable)

6. For *in vivo* pharmacological interventions, is the route of administration reported?

(Yes – 1; No – 0; Not applicable)

7. If anaesthesia was performed, are type, route and dose/concentration described?

(Yes – 1; No – 0; Not applicable)

8. Is the method of euthanasia/tissue collection reported?

(Yes – 1; No – 0; Not applicable)

#### **Animal studies (vertebrates)**

---

1. Is the animal species reported? (If yes, please specify which species)

(Yes – 1; No – 0)

2. Is the strain of the animals reported?  
(Yes – 1; No – 0; Not applicable)
3. Is the sex of the animals reported?  
(Yes – 1; No – 0; Not applicable)
4. Is the age of the animals reported?  
(Yes (exact) – 1; Yes (range) – 0.5; No – 0; Not applicable)
5. Is the number of animals housed together reported?  
(Yes (exact) – 1; Yes (range) – 0.5; No – 0; Not applicable)
6. Is the source/supplier of the animals reported?  
(Yes – 1; No – 0; Not applicable)
7. Are animals reported to be randomized to experimental groups?  
(Yes – 1; No – 0; Not applicable)
8. For *in vivo* pharmacological interventions, is the route of administration reported?  
(Yes – 1; No – 0; Not applicable)
9. If anaesthesia was performed, are type, route and dose/concentration described?  
(Yes – 1; No – 0; Not applicable)
10. Is the method of euthanasia/tissue collection reported?  
(Yes – 1; No – 0; Not applicable)
11. Does the manuscript include an explicit statement of approval by a clearly identified ethics committee?  
(Yes (includes approval and committee) – 1; Yes (includes approval but no committee) – 0.5\*; No – 0; Not applicable)
12. Does the manuscript name the international, national or institutional guidelines followed?  
(Yes – 1; No – 0; Not applicable)

---

#### Human studies

1. Does the manuscript describe the recruitment process (including the target population)?  
(Yes – 1; No – 0)
2. Are the eligibility criteria adequately described?  
(Yes – 1; No – 0)
3. Is the sex of the subjects reported?  
(Yes – 1; No – 0; Not applicable)
4. Is the age range of the subjects reported?  
(Yes – 1; No – 0)
5. Are subjects reported to be randomized to experimental groups?  
(Yes – 1; No – 0; Not applicable)
6. Are the subjects reported to be blinded to the experimental group?  
(Yes – 1; No – 0; Not applicable)
7. For pharmacological interventions, is the route of administration reported?  
(Yes – 1; No – 0; Not applicable)
8. Does the manuscript include an explicit statement of ethical approval and identify the committee(s) approving the study protocol?  
(Yes (includes approval and committee) – 1; Yes (includes approval but no committee) – 0.5; No – 0)
9. Does the manuscript name the international, national or institutional guidelines followed?  
(Yes – 1; No – 0)
10. Does the manuscript report that every subject signed an informed consent form?  
(Yes – 1; No – 0; Not applicable)

**Table S2** – Complete description of geographic region of origin, subject areas and animal species used in articles from both groups.

|                                        | bioRxiv    | PubMed     |
|----------------------------------------|------------|------------|
| <b>Region of origin</b>                |            |            |
| North America                          | 34 (44.7%) | 23 (30.3%) |
| Europe                                 | 32 (42.1%) | 27 (35.5%) |
| Asia                                   | 5 (6.6%)   | 18 (23.7%) |
| Oceania                                | 4 (5.3%)   | 2 (2.6%)   |
| Latin America                          | 1 (1.3%)   | 4 (5.3%)   |
| Africa                                 | 0          | 2 (2.6%)   |
| <b>Subject Areas</b>                   |            |            |
| Neuroscience                           | 34 (44.7%) | 7 (9.2%)   |
| Pharmacology and Toxicology            | 0          | 12 (15.8%) |
| Clinical Trials                        | 0          | 9 (11.8%)  |
| Epidemiology                           | 0          | 9 (11.8%)  |
| Microbiology                           | 7 (9.2%)   | 5 (6.6%)   |
| Cell Biology                           | 6 (7.9%)   | 2 (2.6%)   |
| Physiology                             | 1 (1.3%)   | 6 (7.9%)   |
| Molecular Biology                      | 2 (2.6%)   | 5 (6.6%)   |
| Genetics                               | 5 (6.6%)   | 1 (1.3%)   |
| Genomics                               | 5 (6.6%)   | 1 (1.3%)   |
| Evolutionary Biology                   | 5 (6.6%)   | 0          |
| Developmental Biology                  | 2 (2.6%)   | 3 (3.9%)   |
| Immunology                             | 1(1.3%)    | 3 (3.9%)   |
| Cancer Biology                         | 0          | 3 (3.9%)   |
| Bioengineering                         | 1(1.3%)    | 2 (2.6%)   |
| Bioinformatics                         | 2 (2.6%)   | 1 (1.3%)   |
| Pathology                              | 0          | 2 (2.6%)   |
| Systems Biology                        | 2(2.6%)    | 0          |
| Animal Behavior and Cognition          | 1 (1.3%)   | 1 (1.3%)   |
| Biochemistry                           | 1 (1.3%)   | 1 (1.3%)   |
| Scientific communication and education | 0          | 1 (1.3%)   |
| Synthetic Biology                      | 1 (1.3%)   | 0          |
| Other                                  | -          | 2 (2.6%)   |
| <b>Invertebrate animal species</b>     |            |            |
| <i>Drosophila</i> sp.                  | 1          | 0          |
| <i>Daphnia magna</i>                   | 0          | 1          |
| <b>Vertebrate animal species</b>       |            |            |
| Mouse                                  | 14 (56%)   | 7 (28%)    |
| Rat                                    | 1 (4%)     | 12 (48%)   |
| Macaque                                | 3 (12%)    | 0          |
| Zebrafish                              | 3 (12%)    | 1 (4%)     |
| Chicken                                | 2 (8%)     | 0          |
| Pig                                    | 0          | 2 (8%)     |
| Buffalo                                | 0          | 1 (4%)     |
| Cod                                    | 0          | 1 (4%)     |

|          |        |        |
|----------|--------|--------|
| Cow      | 0      | 1 (4%) |
| Porpoise | 1 (4%) | 0      |
| Turtle   | 1 (4%) | 0      |

**Table S3** – Interevaluator agreement. The top part of the table shows mean agreement between each pair of evaluators (labelled as A to O). The bottom part of the table shows the number of articles analysed by each pair of evaluators. The last column shows the mean agreement of each evaluator with all others.

|   | A  | B     | C     | D     | E     | F     | G     | H     | I     | J     | K     | L     | M     | N     | O     | Mean  |
|---|----|-------|-------|-------|-------|-------|-------|-------|-------|-------|-------|-------|-------|-------|-------|-------|
| A |    | 76.7% | 78.0% | 79.2% | 80.6% | 74.4% | 80.5% | -     | 73.0% | 79.9% | 79.4% | 72.9% | 82.1% | 74.1% | 77.2% | 77.5% |
| B | 10 |       | 82.7% | 83.4% | 81.1% | 77.8% | 77.6% | 78.5% | 83.9% | 82.9% | 79.7% | -     | 87.3% | -     | 85.2% | 81.4% |
| C | 8  | 6     |       | 75.3% | 83.3% | 79.3% | 72.8% | 81.4% | 66.7% | 79.9% | 76.5% | 79.4% | -     | 77.3% | -     | 77.7% |
| D | 8  | 12    | 5     |       | 82.3% | -     | 68.2% | 80.0% | 75.7% | -     | 79.0% | 69.0% | 81.7% | -     | 86.3% | 78.2% |
| E | 6  | 8     | 5     | 11    |       | 80.0% | 85.1% | 84.3% | 82.9% | 87.0% | 84.3% | 69.0% | 85.3% | 78.7% | 82.9% | 81.9% |
| F | 4  | 2     | 4     | 0     | 2     |       | 77.2% | 74.5% | 71.4% | 76.7% | 65.7% | 76.3% | 86.2% | 73.3% | 77.0% | 76.1% |
| G | 2  | 4     | 2     | 2     | 2     | 4     |       | 75.2% | 69.2% | 79.3% | 78.5% | 74.3% | 83.9% | 72.8% | 80.8% | 76.8% |
| H | 0  | 4     | 9     | 7     | 6     | 3     | 5     |       | 78.6% | 82.8% | 88.3% | 82.7% | 83.0% | -     | 77.1% | 80.5% |
| I | 2  | 2     | 3     | 7     | 3     | 6     | 5     | 6     |       | 78.6% | 87.8% | 80.0% | 82.9% | 82.8% | 85.4% | 78.5% |
| J | 6  | 2     | 6     | 0     | 2     | 6     | 1     | 5     | 6     |       | 75.5% | 86.1% | 82.5% | 92.0% | 79.3% | 81.7% |
| K | 6  | 6     | 4     | 4     | 4     | 2     | 3     | 4     | 2     | 4     |       | 83.3% | 87.8% | 8.3%  | 81.6% | 80.8% |
| L | 2  | 0     | 3     | 1     | 1     | 8     | 4     | 2     | 1     | 4     | 8     |       | 83.0% | 88.6% | 89.7% | 79.5% |
| M | 4  | 4     | 0     | 2     | 2     | 1     | 4     | 4     | 2     | 4     | 5     | 5     |       | 85.7% | 85.6% | 84.4% |
| N | 4  | 0     | 3     | 0     | 2     | 9     | 5     | 0     | 5     | 4     | 4     | 6     | 4     |       | 85.7% | 81.3% |
| O | 2  | 4     | 0     | 4     | 2     | 5     | 5     | 2     | 2     | 4     | 2     | 6     | 9     | 6     |       | 82.6% |

**Table S4** – Scores by evaluator for each group of articles.

| Evaluator | bioRxiv (Mean ± SD, n) | PubMed (Mean ± SD, n) |
|-----------|------------------------|-----------------------|
| A         | 59.4 ± 12.8, 16        | 65.1 ± 11.6, 16       |
| B         | 69.1 ± 10.0, 16        | 68.3 ± 11.3, 16       |
| C         | 66.8 ± 17.8, 15        | 67.6 ± 12.3, 13       |
| D         | 66.4 ± 13.9, 16        | 74.3 ± 12.3, 16       |
| E         | 68.7 ± 11.8, 14        | 67.2 ± 11.6, 14       |
| F         | 62.6 ± 8.4, 14         | 68.2 ± 9.4, 15        |
| G         | 66.9 ± 10.1, 13        | 72.3 ± 11.8, 14       |
| H         | 65.1 ± 10.3, 15        | 67.3 ± 11.3, 16       |
| I         | 66.0 ± 15.6, 16        | 65.6 ± 15.3, 14       |
| J         | 66.0 ± 10.3, 14        | 67.4 ± 7.5, 13        |
| K         | 65.4 ± 15.4, 14        | 75.1 ± 7.1, 15        |
| L         | 64.2 ± 11.0, 14        | 76.0 ± 7.9, 14        |
| M         | 66.5 ± 7.9, 11         | 77.5 ± 8.4, 14        |
| N         | 68.6 ± 11.4, 14        | 68.8 ± 10.5, 12       |
| O         | 66.5 ± 10.8, 14        | 76.9 ± 9.2, 14        |

**Table S5** – Reporting scores for each section of the general questionnaire. Sample sizes are per group and statistical results refer to Student’s t test for each comparison. Many articles had no applicable questions within the ‘Drugs and reagents’ section; therefore sample size is reduced for this section.

| Section            | Mean ± SD (bioRxiv) | Mean ± SD (PubMed) | t value | p value | Sample Size                  |
|--------------------|---------------------|--------------------|---------|---------|------------------------------|
| Title              | 84.2 ± 36.7         | 93.4 ± 24.9        | -1.81   | 0.07    | 76                           |
| Risk of Bias       | 39.2 ± 23.6         | 39.9 ± 20.1        | -0.18   | 0.85    | 76                           |
| Drugs and reagents | 63.0 ± 38.8         | 79.4 ± 29.6        | -1.97   | 0.05    | 30 (bioRxiv),<br>38 (PubMed) |
| Data presentation  | 75.1 ± 16.9         | 79.8 ± 12.7        | -1.97   | 0.05    | 76                           |
| Data analysis      | 85.0 ± 21.2         | 83.5 ± 20.0        | 0.45    | 0.65    | 76                           |

**Supplementary Table 6** – Number of articles reporting each item assessed. Questions without the option for partially reported are marked with ‘-’.

| Items assessed                                                             | bioRxiv       |              |               | PubMed        |             |               |
|----------------------------------------------------------------------------|---------------|--------------|---------------|---------------|-------------|---------------|
|                                                                            | Yes           | Part.        | No            | Yes           | Part.       | No            |
| <b>Title/Abstract</b>                                                      |               |              |               |               |             |               |
| Biological model or species                                                | 64<br>(84.2%) | -            | 12<br>(15.8%) | 71<br>(93.4%) | -           | 5<br>(6.6%)   |
| <b>Risk of Bias</b>                                                        |               |              |               |               |             |               |
| Funding source                                                             | 63<br>(82.9%) | -            | 13<br>(17.1%) | 58<br>(76.3%) | -           | 18<br>(23.7%) |
| Conflict of interest statement                                             | 34<br>(44.7%) | -            | 42<br>(55.3%) | 50<br>(65.8%) | -           | 26<br>(34.2%) |
| Sample size calculation                                                    | 7<br>(9.2%)   | 1<br>(1.3%)  | 68<br>(89.5%) | 2<br>(2.6%)   | 0           | 74<br>(97.4%) |
| Blinded assessment of outcomes                                             | 2<br>(4.1%)   | -            | 47<br>(95.9%) | 3<br>(5.2%)   | -           | 55<br>(94.8%) |
| <b>Drugs and Reagents</b>                                                  |               |              |               |               |             |               |
| Suppliers                                                                  | 13<br>(48.1%) | 5<br>(18.5%) | 9<br>(33.3%)  | 31<br>(81.6%) | 3<br>(7.9%) | 4<br>(10.5%)  |
| Antibody validation (citation, catalogue/clone number, validation profile) | 7<br>(53.8%)  | -            | 6<br>(46.2%)  | 3<br>(100%)   | -           | 0             |
| Dose/ concentration (for pharmacological interventions)                    | 18<br>(94.7%) | 0            | 1<br>(5.3%)   | 27<br>(87.1%) | 1<br>(3.2%) | 3<br>(9.7%)   |
| Vehicle (for pharmacological interventions)                                | 11<br>(68.8%) | -            | 5<br>(31.2%)  | 18<br>(62.1%) | -           | 11<br>(37.9%) |
| <b>Data presentation</b>                                                   |               |              |               |               |             |               |
| Clear description of groups                                                | 74<br>(97.4%) | -            | 2<br>(2.6%)   | 75<br>(98.7%) | -           | 1<br>(1.3%)   |

|                                         |               |   |               |               |   |               |
|-----------------------------------------|---------------|---|---------------|---------------|---|---------------|
| Clear timeline                          | 59<br>(84.3%) | - | 11<br>(15.7%) | 59<br>(85.5%) | - | 10<br>(14.5%) |
| Summary estimate definition             | 48<br>(65.7%) | - | 25<br>(34.3%) | 57<br>(81.4%) | - | 13<br>(18.6%) |
| Variation/precision measure description | 49<br>(66.2%) | - | 25<br>(33.8%) | 60<br>(84.5%) | - | 11<br>(15.5%) |
| Unit level data                         | 22<br>(28.9%) | - | 54<br>(71.1%) | 3<br>(4.2%)   | - | 69<br>(95.8%) |
| Clear group attribution of data         | 76<br>(100%)  | - | 0             | 76<br>(100%)  | - | 0             |
| Units description                       | 65<br>(86.7%) | - | 10<br>(13.3%) | 67<br>(93.1%) | - | 5<br>(6.9%)   |
| Symbols meaning                         | 27<br>(69.2%) | - | 12<br>(30.8%) | 45<br>(91.8%) | - | 4<br>(8.2%)   |

### Data analysis

|                                                             |               |             |               |               |               |               |
|-------------------------------------------------------------|---------------|-------------|---------------|---------------|---------------|---------------|
| Experimental unit                                           | 72<br>(94.7%) | -           | 4<br>(5.3%)   | 65<br>(85.5%) | -             | 11<br>(14.5%) |
| Exact sample size description                               | 62<br>(81.6%) | 5<br>(6.6%) | 9<br>(11.8%)  | 58<br>(76.3%) | 9<br>(11.8%)  | 9<br>(11.8%)  |
| Statistical tests used                                      | 62<br>(81.6%) | -           | 14<br>(18.4%) | 67<br>(88.2%) | -             | 9<br>(11.8%)  |
| Variables and groups to which the statistical result refers | 69<br>(90.8%) | -           | 7<br>(9.2%)   | 72<br>(94.7%) | -             | 4<br>(5.3%)   |
| Complete statistical results                                | 58<br>(76.3%) | 7<br>(9.2%) | 11<br>(14.5%) | 49<br>(64.5%) | 18<br>(23.7%) | 9<br>(11.8%)  |
| Exact p values                                              | 49<br>(64.5%) | 6<br>(7.9%) | 21<br>(27.6%) | 39<br>(51.3%) | 12<br>(15.8%) | 25<br>(32.9%) |

### In vitro studies

|                                                 |                    |              |                    |               |                    |              |
|-------------------------------------------------|--------------------|--------------|--------------------|---------------|--------------------|--------------|
| Source/supplier                                 | 9 (50%)<br>(11.1%) | 2<br>(11.1%) | 7<br>(38.9%)       | 12<br>(66.7%) | 0                  | 6<br>(33.3%) |
| Authentication (within 1 year from experiments) | 0<br>(5.9%)        | 1<br>(5.9%)  | 16<br>(94.1%)      | 0             | 0                  | 18<br>(100%) |
| Culture medium                                  | 14<br>(77.8%)      | 0            | 4<br>(22.2%)       | 17<br>(94.4%) | 0                  | 1<br>(5.6%)  |
| Culture conditions (temperature, atmosphere)    | 3<br>(16.7%)       | 6<br>(33.3%) | 9 (50%)<br>(27.6%) | 7<br>(38.9%)  | 9 (50%)<br>(23.7%) | 2<br>(11.1%) |

### Animal studies (vertebrates)

|                |               |              |               |              |              |               |
|----------------|---------------|--------------|---------------|--------------|--------------|---------------|
| Species        | 25<br>(100%)  | -            | 0             | 25<br>(100%) | -            | 0             |
| Strain         | 18<br>(78.3%) | -            | 5<br>(21.7%)  | 24<br>(100%) | -            | 0             |
| Sex            | 12<br>(48%)   | -            | 13<br>(52%)   | 18<br>(75%)  | -            | 6 (25%)       |
| Age            | 5<br>(20.8%)  | 9<br>(37.5%) | 10<br>(41.7%) | 7<br>(29.2%) | 7<br>(29.2%) | 10<br>(41.6%) |
| Housing number | 1<br>(4.3%)   | 1<br>(4.3%)  | 21<br>(91.3%) | 3<br>(12.5%) | 2<br>(8.3%)  | 19<br>(79.2%) |

|                                                             |               |   |               |               |   |               |
|-------------------------------------------------------------|---------------|---|---------------|---------------|---|---------------|
| Source/supplier                                             | 12<br>(48%)   | - | 13<br>(52%)   | 22<br>(88%)   | - | 3 (12%)       |
| Randomization                                               | 0             | - | 14<br>(100%)  | 8<br>(47.1%)  | - | 9<br>(52.9%)  |
| Route of administration (for pharmacological interventions) | 6<br>(100%)   | - | 0             | 10<br>(100%)  | - | 0             |
| Anaesthesia (type, route, dose/concentration)               | 10<br>(66.7%) | - | 5<br>(33.3%)  | 6 (60%)       | - | 4 (40%)       |
| Euthanasia method                                           | 8<br>(47.1%)  | - | 9<br>(52.9%)  | 8<br>(44.4%)  | - | 10<br>(55.6%) |
| Approval by ethics committee                                | 14<br>(56%)   | 0 | 11<br>(44%)   | 16<br>(66.7%) | 0 | 8<br>(33.3%)  |
| Ethics guidelines followed                                  | 14<br>(58.3%) | - | 10<br>(41.7%) | 17<br>(68%)   | - | 8 (32%)       |

### Human studies

|                                                             |               |   |               |               |             |               |
|-------------------------------------------------------------|---------------|---|---------------|---------------|-------------|---------------|
| Recruitment process                                         | 19<br>(59.4%) | - | 13<br>(40.6%) | 28<br>(87.5%) | -           | 4<br>(12.5%)  |
| Eligibility criteria                                        | 19<br>(59.4%) | - | 13<br>(40.6%) | 29<br>(90.6%) | -           | 3<br>(9.4%)   |
| Sex                                                         | 27<br>(87.1%) | - | 4<br>(12.9%)  | 29<br>(90.6%) | -           | 3<br>(9.4%)   |
| Age range                                                   | 26<br>(81.2%) | - | 6<br>(18.8%)  | 27<br>(84.4%) | -           | 5<br>(15.6%)  |
| Randomization                                               | 1 (25%)       | - | 3 (75%)       | 8<br>(88.9%)  | -           | 1<br>(11.1%)  |
| Blinding of subjects                                        | 1<br>(14.3%)  | - | 6<br>(85.7%)  | 1<br>(16.7%)  | -           | 5<br>(83.3%)  |
| Route of administration (for pharmacological interventions) | 2<br>(100%)   | - | 0             | 2<br>(66.7%)  | -           | 1<br>(33.3%)  |
| Ethics committee approval                                   | 23<br>(71.9%) | 0 | 9<br>(28.1%)  | 23<br>(71.8%) | 2<br>(6.2%) | 7<br>(21.9%)  |
| Ethics guideline followed                                   | 8 (25%)       | - | 24<br>(75%)   | 10<br>(31.2%) | -           | 22<br>(68.8%) |
| Signed informed consent                                     | 27<br>(90%)   | - | 3 (10%)       | 15<br>(68.2%) | -           | 7<br>(31.8%)  |



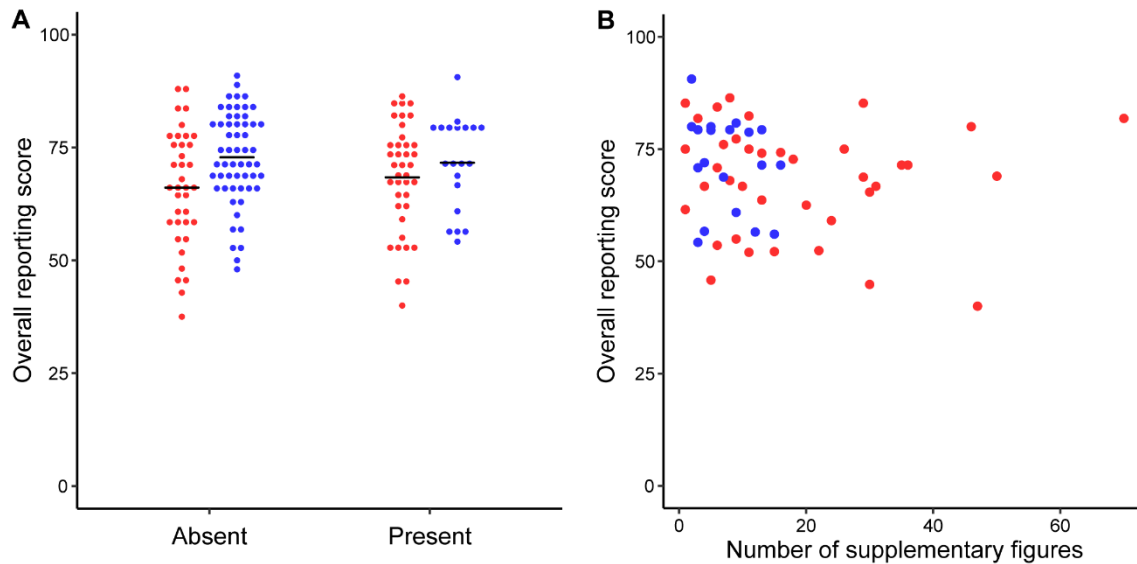

**Figure S1** – Correlations between reporting scores and supplementary material. **(A)** Overall reporting score according to presence of supplementary material. Two-way ANOVA,  $p_{\text{group}}=0.005$  ( $F=8.03$ ,  $df=1$ ),  $p_{\text{supplmat}}=0.70$  ( $F=0.15$ ,  $df=1$ ),  $p_{\text{interaction}}=0.38$  ( $F=0.77$ ,  $df=1$ ). bioRxiv:  $n_{\text{absent}}=37$ ,  $n_{\text{present}}=39$ ; PubMed:  $n_{\text{absent}}=56$ ,  $n_{\text{present}}=20$ . **(B)** Overall reporting score and size of supplementary material (number of figure subpanels/tables).  $\rho=-0.20$ ,  $p=0.13$ ,  $n=59$  (all articles with supplementary material),  $\rho=-0.12$ ,  $p=0.46$ ,  $n=39$  (bioRxiv) and  $\rho=-0.27$ ,  $p=0.25$ ,  $n=20$  (PubMed). In all panels, bioRxiv articles are in red and PubMed ones are in blue.

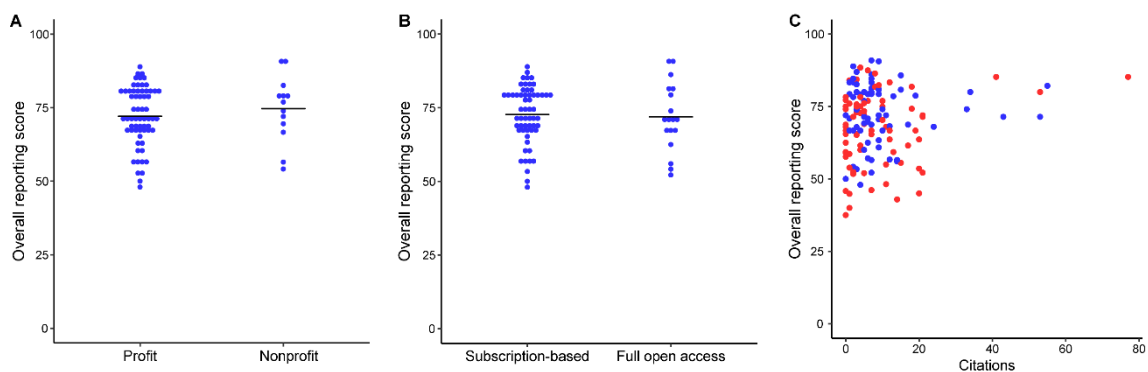

**Figure S2** – Correlation between reporting scores, publication venue and citations. **(A)** Publishers were classified as for-profit or non-profit. For-profit:  $72.1 \pm 10.0$ ,  $n=63$ ; Non-profit:  $74.7 \pm 11.1$ ,  $n=13$ . Student's *t* test,  $t=-0.85$ ,  $p=0.39$ . **(B)** Open access status of the journal. Subscription-based,  $72.7 \pm 9.7$ ,  $n=58$ ; Full open access,  $71.9 \pm 11.6$ ,  $n=18$ . Student's *t* test,  $t=0.31$ ,  $p=0.76$ . Values are mean  $\pm$  S.D. **(C)** Correlation between number of citations and overall

reporting score. PubMed:  $\rho=0.03$ ,  $p=0.78$ ,  $n=76$ ; bioRxiv:  $\rho=0.12$ ,  $p=0.29$ ,  $n=76$ . In all panels, bioRxiv articles are in red and PubMed ones are in blue.

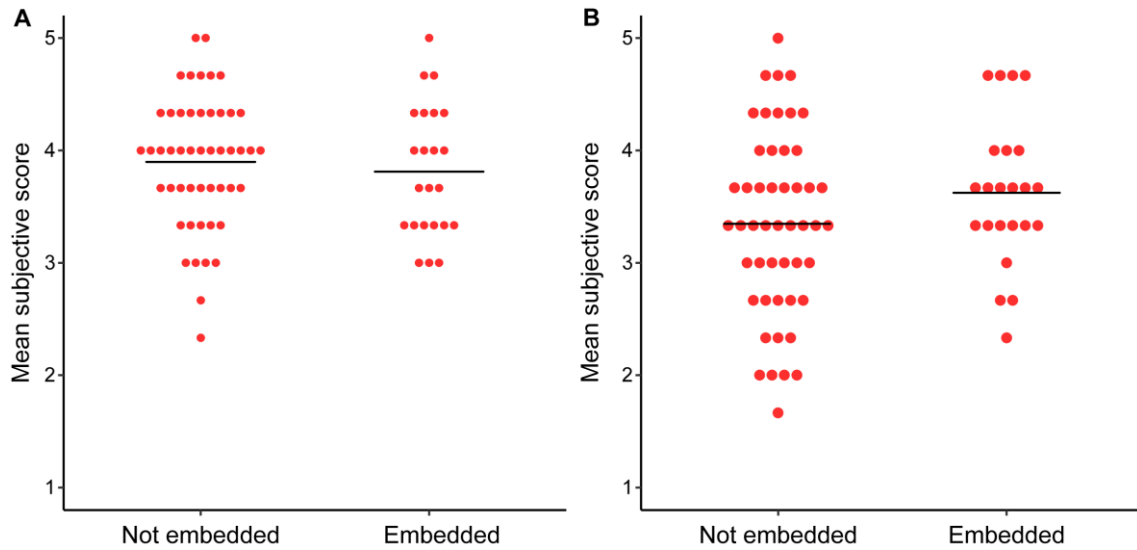

**Figure S3** – Effect of formatting on subjective assessments of preprints. **(A)** Subjective assessment on title/abstract clarity. Student's t test,  $t=0.58$ ,  $p=0.56$ . **(B)** Subjective assessment on easiness to locate information in the article. Student's t test,  $t=-1.43$ ,  $p=0.16$ .  $n_{\text{Not embedded}}=49$ ,  $n_{\text{Embedded}}=23$ .
